# Supplementary material for: Simultaneous seasonal dry/wet signals in eastern and central Asia since the Last Glacial Maximum
Source: Copernicus journal article supplement (doi:10.5194/cp-20-2415-2024), 2024-11-04
Supplement: Supplementary file 1 [file cp-20-2415-2024-supplement.pdf]

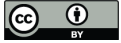

*Supplement of*

## **Simultaneous seasonal dry/wet signals in eastern and central Asia since the Last Glacial Maximum**

**Simin Peng et al.**

*Correspondence to:* Yu Li (liyu@lzu.edu.cn)

The copyright of individual parts of the supplement might differ from the article licence.

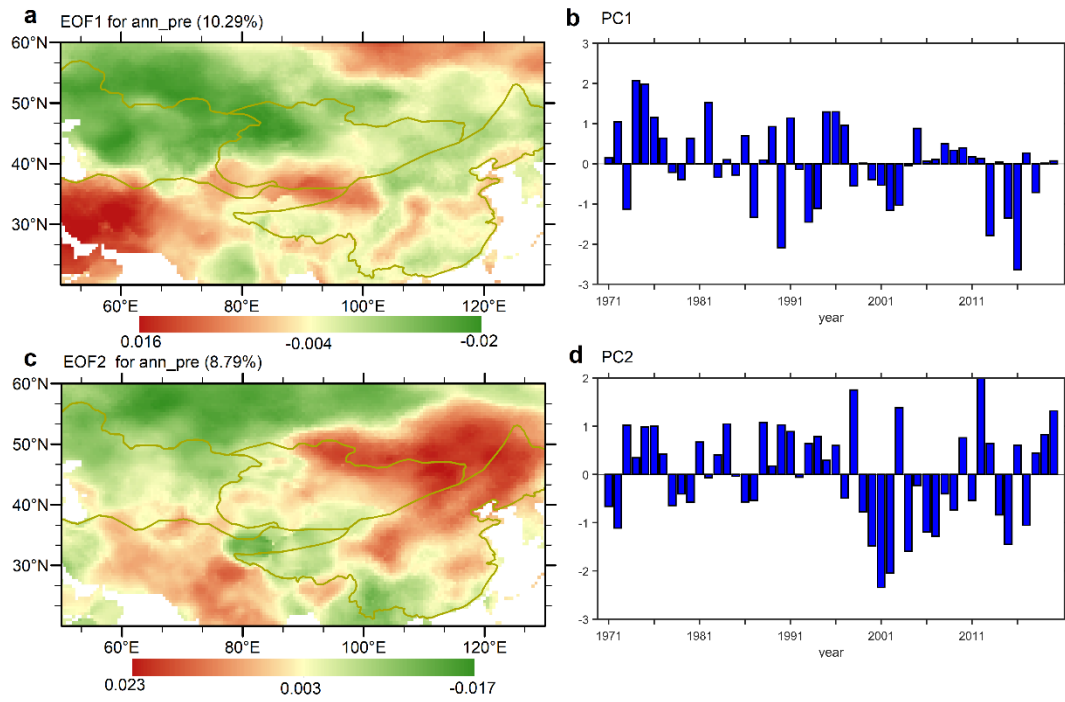

**Figure S1.** The EOF modes and corresponding time series of annual mean precipitation in EA and CA over 1971–2020.

**Table S1.** Paleoclimate records selected in this study.

| Code | Section name       | Record type | Lat   | Lon   | Evaluation (m a.s.l) | Precipitation regime | Dating materials                                 | Dating Method   | Time period (cal ka BP) | Proxy                                                                                  | Proxy indication     | References                                    |
|------|--------------------|-------------|-------|-------|----------------------|----------------------|--------------------------------------------------|-----------------|-------------------------|----------------------------------------------------------------------------------------|----------------------|-----------------------------------------------|
| 1    | Caspian Sea        | Lake        | 41.93 | 50.67 | -28                  | winter               | Ostracods                                        | <sup>14</sup> C | 12.4-2.4                | Pollen                                                                                 | Moisture             | Leroy et al. (2014)                           |
| 2    | YE section         | Loess       | 37.60 | 55.43 | 383                  | winter               | Quartz                                           | OSL             | 11.8-0                  | $\delta^{13}\text{C}_{\text{org}}$                                                     | Moisture             | Wang et al. (2020)                            |
| 3    | Ton Cave           | Speleothem  | 38.40 | 67.34 | 3226                 | winter               | Carbonate                                        | U-Th            | 135-0                   | $\delta^{13}\text{C}$                                                                  | Moisture             | Cheng et al. (2016)                           |
| 4    | Valikhanov section | Loess       | 43.17 | 69.31 | 1000                 | winter               | Bulk organic matter, charcoal                    | <sup>14</sup> C | 46-0                    | $\delta^{13}\text{C}$                                                                  | Moisture             | Ran and Feng (2014)                           |
| 5    | Osh section        | Loess       | 40.61 | 73.01 | 1038                 | winter               | Humins                                           | <sup>14</sup> C | 30-0                    | Grain-size, MS                                                                         | Effective moisture   | Li et al. (2021)                              |
| 6    | Lake Karakul       | Lake        | 39.02 | 73.53 | 3915                 | winter               | plant remains, bulk sediments, living charophyte | <sup>14</sup> C | ~29-0                   | TIC, TOC, C/N, Grain-size, $\delta^{13}\text{C}_{\text{carb}}$ , $\delta^{18}\text{O}$ | Moisture             | Heinecke et al. (2017); Mischke et al. (2017) |
| 7    | BSK section        | Loess       | 42.70 | 74.78 | 1432                 | winter               | Bulk organic matter                              | <sup>14</sup> C | 26-0                    | Grain-size, MS, color proxies                                                          | Moisture             | Li et al. (2020a)                             |
| 8    | Lake Issyk-Kul     | Lake        | 42.50 | 77.10 | 1607                 | summer               | Bulk sediments                                   | <sup>14</sup> C | 12.75-3.6               | $\delta^{18}\text{O}$ , $\delta^{13}\text{C}$ , Pollen, CaCO <sub>3</sub> , MS         | Moisture             | Ricketts et al. (2001); Leroy et al. (2021)   |
| 9    | HC14 section       | Loess       | 43.88 | 80.60 | 554                  | summer               | Bulk organic matter                              | <sup>14</sup> C | 10-0                    | MS                                                                                     | Moisture             | Jia et al. (2021)                             |
| 10   | ZS section         | Loess       | 42.93 | 80.96 | 1650                 | summer               | Quartz                                           | OSL             | 12.6-0                  | Grain-size, MS                                                                         | Moisture             | Kang et al. (2020)                            |
| 11   | Lake Sayram        | Lake        | 41.50 | 81.03 | 2072                 | summer               | Bulk sediments                                   | <sup>14</sup> C | 13.8-0                  | Pollen                                                                                 | Moisture             | Jiang et al. (2013, 2022)                     |
| 12   | Kesang Cave        | Speleothem  | 42.87 | 81.75 | ~2000                | summer               | Carbonate                                        | U-Th            | 22.8-0                  | $\delta^{18}\text{O}$                                                                  | Precipitation        | Cheng et al. (2012, 2016)                     |
| 13   | Yili section       | Loess       | 43.86 | 81.97 | 928                  | summer               | Charcoal                                         | <sup>14</sup> C | 15-0                    | A/C ratio                                                                              | Moisture             | Li et al. (2011)                              |
| 14   | Lake Aibi          | Lake        | 45.01 | 82.86 | 200                  | summer               | Bulk sediments                                   | <sup>14</sup> C | 13.8-0                  | Pollen                                                                                 | Moisture             | Wang et al. (2013)                            |
| 15   | XEB section        | Loess       | 43.42 | 82.99 | 888                  | summer               | Quartz                                           | OSL             | 12-0                    | Grain-size, MS                                                                         | Moisture             | Kang et al. (2020)                            |
| 16   | TLD16 section      | Loess       | 43.36 | 83.02 | 1567                 | summer               | Quartz                                           | OSL             | 20-0                    | MS                                                                                     | Moisture             | Jia et al. (2021)                             |
| 17   | ZKT section        | Loess       | 43.53 | 83.30 | 846                  | summer               | Bulk organic matter                              | <sup>14</sup> C | 16-0                    | MS                                                                                     | Moisture             | Chen et al. (2016); Jia et al. (2021)         |
| 18   | KS16 section       | Loess       | 43.43 | 83.62 | 1314                 | summer               | Quartz                                           | OSL             | 12-0                    | MS                                                                                     | Moisture             | Jia et al. (2021)                             |
| 19   | Baluk Cave         | Speleothem  | 42.43 | 84.73 | 2400                 | summer               | Carbonate                                        | U-Th            | 9.3-0                   | Trace elements                                                                         | Moisture             | Liu et al. (2020)                             |
| 20   | LJW 10 section     | Loess       | 43.97 | 85.33 | 1462                 | summer               | Quartz and K-feldspar                            | OSL             | 16-0                    | MS                                                                                     | Moisture             | Chen et al. (2016)                            |
| 21   | Lake Bosten        | Lake        | 41.94 | 86.76 | 1048                 | summer               | Bulk organic matter, plant, tree leaves          | <sup>14</sup> C | 8.2-0                   | Pollen                                                                                 | Moisture             | Huang et al. (2009)                           |
| 22   | Narenxia peat      | Peat        | 48.80 | 86.90 | 1760                 | summer               | Bulk peat, lake mud                              | <sup>14</sup> C | 11.8-0                  | Pollen, $\delta^{13}\text{C}$                                                          | Annual precipitation | Feng et al. (2017); Zhang and Feng (2018)     |
| 23   | Lake Kanas         | Lake        | 48.70 | 87.01 | 1365                 | summer               | Terrestrial plant macrofossils                   | <sup>14</sup> C | 13.4-0                  | Pollen                                                                                 | Annual precipitation | Huang et al. (2018)                           |
| 24   | Big Black peat     | Peat        | 48.68 | 87.18 | 2168                 | summer               | Cellulose                                        | <sup>14</sup> C | 9.5-0                   | Pollen, $\delta^{18}\text{O}$ , $\delta^{13}\text{C}$                                  | Moisture             | Xu et al. (2019)                              |
| 25   | Lake               | Lake        | 47.20 | 87.29 | 479                  | summer               | Bulk organic matter                              | <sup>14</sup> C | 9.5-0                   | Pollen, $\delta^{13}\text{C}$ , grain-                                                 | Moisture             | Liu et al. (2008)                             |

|    |                       |             |       |       |      |        |                                                  |                      |        |                                                     |                                       |                                                         |
|----|-----------------------|-------------|-------|-------|------|--------|--------------------------------------------------|----------------------|--------|-----------------------------------------------------|---------------------------------------|---------------------------------------------------------|
| 26 | Wulungu<br>ZL section | Loess       | 43.50 | 87.33 | 1756 | summer | K-feldspar                                       | OSL                  | 10.8-0 | size<br>MS                                          | Moisture                              | Chen et al. (2016); Gao et al. (2019)                   |
| 27 | Tuolehaite<br>peat    | Peat        | 48.44 | 87.54 | 1700 | summer | Plant residuals                                  | <sup>14</sup> C      | 10.6-0 | Pollen                                              | Moisture                              | Zhang et al. (2020)                                     |
| 28 | Chaiwopu<br>peat      | Peat        | 43.35 | 88.30 | 800  | summer | Plant, Bulk sediments                            | <sup>14</sup> C      | 11.5-0 | Pollen                                              | Moisture                              | Yang et al. (2021)                                      |
| 29 | Hoton Nurr            | Lake        | 48.67 | 88.30 | 2083 | summer | Bulk sediments                                   | <sup>14</sup> C      | 11.5-0 | Pollen                                              | Annual precipitation                  | Rudaya et al. (2009)                                    |
| 30 | Lake Akkol            | Lake        | 50.38 | 89.42 | 2204 | summer | Bulk sediments                                   | <sup>14</sup> C      | 10-0   | Pollen                                              | Vegetation change                     | Blyakharchuk et al. (2007)                              |
| 31 | Achit Nuur            | Lake        | 49.42 | 90.52 | 1444 | summer | Bulk sediments, root, mollusk                    | <sup>14</sup> C      | 22.6-0 | δ <sup>18</sup> O                                   | Annual precipitation                  | Sun et al. (2013)                                       |
| 32 | Lake Lup-Nur          | Lake        | 40.00 | 91.00 | 780  | summer | Quartz                                           | OSL                  | 9-0    | Soluble salt content, grain-size, ostracod, pollen, | Moisture                              | Liu et al. (2016)                                       |
| 33 | Lake Balikun          | Lake        | 43.67 | 92.80 | 1575 | summer | Bulk organic matter, plant macrofossils, pollen; | <sup>14</sup> C      | 29.1-0 | Pollen                                              | Moisture                              | Tao et al. (2010); An et al. (2012); Zhao et al. (2015) |
| 34 | Bayan Nurr            | Lake        | 49.98 | 93.95 | 932  | summer | Bulk sediments                                   | <sup>14</sup> C      | 15-0   | Pollen                                              | Annual precipitation                  | Tian et al. (2014)                                      |
| 35 | Qinghai Lake          | Lake        | 37.00 | 100.0 | 3200 | summer | Bulk organic matter                              | <sup>14</sup> C      | 18-0   | δ <sup>18</sup> O                                   | summer monsoon precipitation          | Shen et al. (2005); Liu et al. (2007)                   |
| 36 | Qilian section        | Loess       | 38.16 | 100.2 | 2810 | summer | Bulk organic matter                              | <sup>14</sup> C      | 22-0   | δ <sup>18</sup> O, δ <sup>13</sup> C                | Effective moisture                    | Li et al. (2020b)                                       |
| 37 | Lake Ulaan            | Lake        | 44.53 | 103.6 | 1024 | summer | Bull samples, quartz                             | <sup>14</sup> C, OSL | 17-0   | TOC                                                 | Moisture                              | Lee et al. (2013)                                       |
| 38 | Dongge Cave           | Speleot hem | 25.28 | 108.0 | 680  | summer | Carbonate                                        | U-Th                 | 16-0   | δ <sup>18</sup> O                                   | summer monsoon precipitation          | Dykoski et al. (2005)                                   |
| 39 | Jiuxian Cave          | Speleot hem | 33.56 | 109.1 | 1495 | summer | Carbonate                                        | U-Th                 | 19-0   | δ <sup>18</sup> O                                   | summer monsoon precipitation          | Cai et al. (2010)                                       |
| 40 | Lianhua Cave          | Speleot hem | 29.48 | 109.5 | 455  | summer | Carbonate                                        | U-Th                 | 12.5-0 | δ <sup>18</sup> O                                   | summer monsoon precipitation strength | Zhang et al. (2013)                                     |
| 41 | Sanbao Cave           | Speleot hem | 31.66 | 110.4 | 1900 | summer | Carbonate                                        | U-Th                 | 13-0   | δ <sup>18</sup> O                                   | Summer rainfall                       | Dong et al. (2009)                                      |
| 42 | Hulu Cave             | Speleot hem | 32.50 | 119.1 | 90   | summer | Carbonate                                        | U-Th                 | Nov-75 | δ <sup>18</sup> O                                   | summer monsoon precipitation          | Wang et al. (2001)                                      |

## Reference

- An, C., Lu, Y., Zhao, J., Tao, S., Dong, W., Li, H., Jin, M., and Wang, Z.: A high-resolution record of Holocene environmental and climatic changes from Lake Balikun (Xinjiang, China): implications for central Asia, *Holocene*, 22, 43–52, <https://doi.org/10.1177/0959683611405244>, 2012.
- Blyakharchuk, T. A., Wright, H. E., Borodavko, P. S., van der Knaap, W. O., and Ammann, B.: Late glacial and Holocene vegetational history of the Altai mountains (southwestern tuva republic, siberia), *Palaeogeogr. Palaeoclimatol.*, 245, 518–534, <https://doi.org/10.1016/j.palaeo.2006.09.010>, 2007.

- Cai, Y., Tan, L., Cheng, H., An, Z., Edwards, R. L., Kelly, M. M., Kong, X., and Wang, X.: The variation of summer monsoon precipitation in central China since the last deglaciation, *Earth Planet. S. Lett.*, 291, 21–31, <https://doi.org/10.1016/j.epsl.2009.12.039>, 2010.
- Chen, F., Jia, J., Chen, J., Li, G., Zhang, X., Xie, H., Xia, D., Huang, W., and An, C.: A persistent Holocene wetting trend in arid central Asia, with wettest conditions in the late Holocene, revealed by multi-proxy analyses of loess-paleosol sequences in Xinjiang, China, *Quaternary Sci. Rev.*, 146, 134–146, 55 <https://doi.org/10.1016/j.quascirev.2016.06.002>, 2016.
- Cheng, H., Zhang, P., Spötl, C., Edwards, R. L., Cai, Y., Zhang, D., Sang, W., Tan, M., and An, Z.: The climatic cyclicity in semiarid central Asia over the past 500,000 years, *Geophys. Res. Lett.*, 39, L01705, <https://doi.org/10.1029/2011gl050202>, 2012.
- Cheng, H., Spötl, C., Breitenbach, S. F. M., Sinha, A., Wassenburg, J. A., Jochum, K. P., Scholz, D., Li, X., Peng, Y., Lv, Y., Zhang, P., Votintseva, A., Loginov, V., Ning, Y. F., Kathayat, G., and Edwards, R. L.: Climate variations of Central Asia on orbital to millennial timescales, *Sci. Rep.*, 6, 36975, <https://doi.org/10.1038/srep36975>, 2016.
- Dong, J., Wang, Y., Cheng, H., Hardt, B., Edwards, R. L., Kong, X., Wu, J., Chen, S., Liu, D., Jiang, X., and Zhao, K.: A high-resolution stalagmite record of the Holocene East Asian monsoon from Mt Shennongjia, central China, *The Holocene*, 20(2), 257–264, <https://doi.org/10.1177/0959683609350393>, 2010.
- Dykoski, C. A., Edwards, R. L., Cheng, H., Yuan, D., Cai, Y., Zhang, M., Lin, Y., Qing, J., An, Z., and Revenaugh, J.: A high-resolution, absolute-dated Holocene and deglacial Asian monsoon record from Dongge Cave, China, *Earth Planet. Sc. Lett.*, 233, 71–86, <https://doi.org/10.1016/j.epsl.2005.01.036>, 2005.
- Feng, Z., Sun, A., Abdusalih, N., Ran, M., Kurban, A., Lan, B., Zhang, D., and Yang, Y.: Vegetation changes and associated climatic changes in the southern Altai Mountains within China during the Holocene, *Holocene*, 27, 683–693, <https://doi.org/10.1177/0959683616670469>, 2016.
- Gao, F., Jia, J., Xia, D., Lu, C., Lu, H., Wang, Y., Liu, H., Ma, Y., and Li, K.: Asynchronous Holocene climate optimum across mid-latitude Asia, *Palaeogeogr. Palaeoclimatol.*, 518, 206–214, <https://doi.org/10.1016/j.palaeo.2019.01.012>, 2019.
- Heinecke, L., Mischke, S., Adler, K., Barth, A., Biskaborn, B. K., Plessen, B., Ingmar, N., Gerhard, K., Ilhomjon, R., and Herzsuh, U.: Climatic and limnological changes at Lake Karakul (Tajikistan) during the last ~29 cal ka, *J. Paleolimnol.*, 58, 317–334, <https://doi.org/10.1007/s10933-017-9980-0>, 2017.
- Huang, X., Chen, F., Fan, Y., and Yang, M.: Dry late-glacial and early Holocene climate in arid central Asia indicated by lithological and palynological evidence from Bosten Lake, China, *Quatern. Int.*, 194, 19–27, <https://doi.org/10.1016/j.quaint.2007.10.002>, 2009.
- Huang, X., Peng, W., Rudaya, N., Grimm, E.C., Chen, X., Cao, X., Zhang, J., Pan, X., Liu, S., Chen, C., and Chen, F.: Holocene vegetation and climate dynamics in the Altai Mountains and surrounding areas, *Geophys. Res. Lett.*, 45(13), 6628–6636, <https://doi.org/10.1029/2018GL078028>, 2018.
- Jia, J., Chen, J., Wang, Z., Chen, S., Wang, Q., Wang, L., Yang, L., Xia, D., and Chen, F.: No evidence for an anti-phased Holocene moisture regime in mountains and basins in Central Asian: records from Ili loess, Xinjiang, *Palaeogeogr. Palaeoclimatol.*, 572, 110407, <https://doi.org/10.1016/j.palaeo.2021.110407>, 2021.

- Jiang, Q., Ji, J., Shen, J., Matsumoto, R., Tong, G., Qian, P., Ren, X., and Yan, D.: Holocene vegetational and climatic variation in westerly-dominated areas of Central Asia inferred from the Sayram Lake in northern Xinjiang, China, *Sci. China Earth Sci.*, 56, 339–353, <https://doi.org/10.1007/s11430-012-4550-9>, 2013.
- Jiang, Q., Meng, B., Wang, Z., Qian, P., Zheng, J., Jiang, J., Zhao, C., Hou, J., Dong, G., Shen, J., Liu, W., Liu, Z., and Chen, F.: Exceptional terrestrial warmth around 4200–2800 years ago in Northwest China, *Sci. Bull.*, 67, 427–436, <https://doi.org/10.1016/j.scib.2021.11.001>, 2022.
- Kang, S., Wang, X., Roberts, H. M., Duller, G. A., Song, Y., Liu, W., Zhang, R., Liu, X., and Lan, J.: Increasing effective moisture during the Holocene in the semiarid regions of the Yili Basin, central Asia: evidence from loess sections, *Quaternary Sci. Rev.*, 246, 106553, <https://doi.org/10.1016/j.quascirev.2020.106553>, 2020.
- Lee, M. K., Lee, Y. I., Lim, H. S., Lee, J. I., and Yoon, H. I.: Late Pleistocene–Holocene records from Lake Ulaan, southern Mongolia: implications for east Asian palaeomonsoonal climate changes, *J. Quaternary Sci.*, 28, 370–378, <https://doi.org/10.1002/jqs.2626>, 2013.
- Leroy, S. A. G., López-Merino, L., Tudryn, A., Chalié, F., and Gasse, F.: Late Pleistocene and Holocene palaeoenvironments in and around the middle Caspian basin as reconstructed from a deep-sea core, *Quaternary Sci. Rev.*, 101, 91–110, <https://doi.org/10.1016/j.quascirev.2014.07.011>, 2014.
- Leroy, S. A. G., Ricketts, R. D., and Rasmussen, K. A.: Climatic and limnological changes 12,750 to 3600 years ago in the Issyk-Kul catchment, Tien Shan, based on palynology and stable isotopes, *Quaternary Sci. Rev.*, 259, 106897, <https://doi.org/10.1016/j.quascirev.2021.106897>, 2021.
- Li, X., Zhao, K., Dodson, J., and Zhou, X.: Moisture dynamics in central Asia for the last 15 kyr: new evidence from Yili Valley, Xinjiang, NW China, *Quaternary Sci. Rev.*, 30, 3457–3466, <https://doi.org/10.1016/j.quascirev.2011.09.010>, 2011.
- Li, Y., Song, Y., Orozbaev, R., Dong, J., Li, X., and Zhou, J.: Moisture evolution in central Asia since 26 ka: insights from a Kyrgyz loess section, western Tian Shan, *Quaternary Sci. Rev.*, 249, 106604, <https://doi.org/10.1016/j.quascirev.2020.106604>, 2020a.
- Li, Y., Peng, S., Liu, H., Zhang, X., Ye, W., Han, Q., Zhang, Y., Xu, L., and Li, Y.: Westerly jet stream controlled climate change mode since the Last Glacial Maximum in the northern Qinghai-Tibet Plateau, *Earth Planet. Sci. Lett.*, 549, 116529, <https://doi.org/10.1016/j.epsl.2020.116529>, 2020b.
- Li, Y., Song, Y., Kaskaoutis, D. G., Zan, J., Orozbaev, R., Tan, L., and Chen, X.: Aeolian dust dynamics in the Fergana Valley, Central Asia, since ~30 ka inferred from loess deposits, *Geosci. Front.*, 12, 101180, <https://doi.org/10.1016/j.gsf.2021.101180>, 2021.
- Liu, X., Herzsuh, U., Shen, J., Jiang, Q., and Xiao, X.: Holocene environmental and climatic changes inferred from Wulungu Lake in northern Xinjiang, China, *Quatern. Res.*, 70(3), 412–425, <https://doi.org/10.1016/j.yqres.2008.06.005>, 2008.
- Liu, X., Shen, J., Wang, S., Wang, Y., and Liu, W.: Southwest monsoon changes indicated by oxygen isotope of ostracode shells from sediments in Qinghai lake since the late glacial, *Chinese Sci. Bull.*, 4, 109–114, <https://doi.org/10.1007/s11434-007-0086-3>, 2007.
- Liu, C., Zhang, J. F., Jiao, P., and Mischke, S.: The Holocene history of Lop Nur and its palaeoclimate implications, *Quaternary Sci. Rev.*, 148, 163–175, <https://doi.org/10.1016/j.quascirev.2016.07.016>, 2016.

- Liu, X., Liu, J., Shen, C., Yang, Y., Chen, J., Chen, S., Wang, X., Wu, C., and Chen, F.: Inconsistency between records of  $\delta^{18}\text{O}$  and trace element ratios from stalagmites: evidence for increasing mid-late Holocene moisture in arid central Asia, *Holocene*, 30, 369–379, <https://doi.org/10.1177/0959683619887>, 2020.
- Mischke, S., Lai, Z., Aichner, B., Heinecke, L., Makhmudov, Z., Kuessner, M. L., and Herzschuh, U.: Radiocarbon and optically stimulated luminescence dating of sediments from Lake Karakul, Tajikistan, *Quat. Geochronol.*, 41, 51–61, <https://doi.org/10.1016/j.quageo.2017.05.008>, 2017.
- Ran, M. and Feng, Z.: Variation in carbon isotopic composition over the past ca. 46,000 yr in the loess-paleosol sequence in central Kazakhstan and paleoclimatic significance, *Org. Geochem.*, 73, 47–55, <https://doi.org/10.1016/j.orggeochem.2014.05.006>, 2014.
- Ricketts, R. D., Johnson, T. C., Brown, E. T., Rasmussen, K. A., and Romanovsky, V. V.: The Holocene paleolimnology of Lake Issyk-Kul, Kyrgyzstan: trace element and stable isotope composition of ostracodes, *Palaeogeogr. Palaeoclimatol.*, 176, 207–227, [https://doi.org/10.1016/s0031-0182\(01\)00339-x](https://doi.org/10.1016/s0031-0182(01)00339-x), 2001.
- Rudaya, N., Tarasov, P., Dorofeyuk, N., Solovieva, N., Kalugin, I., Andreev, A., Daryin, A., Diekmann, B., Riedel, F., Tserendash, N., and Wagner, M.: Holocene environments and climate in the Mongolian Altai reconstructed from the Hoton-Nur pollen and diatom records: a step towards better understanding climate dynamics in Central Asia, *Quaternary Sci. Rev.*, 28, 540–554, <https://doi.org/10.1016/j.quascirev.2008.10.013>, 2009.
- Shen, J., Liu, X., Wang, S., and Matsumoto, R.: Palaeoclimatic changes in the Qinghai Lake area during the last 18,000 years, *Quatern. Int.*, 136(1), 131–140, <https://doi.org/10.1016/j.quaint.2004.11.014>, 2005.
- Sun, A., Feng, Z., Ran, M., and Zhang, C.: Pollen-recorded bioclimatic variations of the last ~22,600 years retrieved from Achit Nuur core in the western Mongolian Plateau, *Quatern. Int.*, 311, 36–43, <https://doi.org/10.1016/j.quaint.2013.07.002>, 2013.
- Tao, S., An, C., Chen, F., Tang, L., Wang, Z., Lü, Y., Li, Z., Zheng, T., and Zhao, J.: Pollen-inferred vegetation and environmental changes since 16.7 ka BP at Balikun Lake, Xinjiang, *Chinese Sci. Bull.*, 55, 2449–2457, <https://doi.org/10.1007/s11434-010-3174-8>, 2010.
- Tian, F., Herzschuh, U., Telford, R. J., Mischke, S., Van der Meeren, T., and Krenzel, M.: A modern pollen-climate calibration set from central-western Mongolia and its application to a late glacial-Holocene record, *J. Biogeogr.*, 41, 1909–1922, <https://doi.org/10.1111/jbi.12338>, 2014.
- Wang, Q., Wei, H., Khormali, F., Wang, L., Xie, H., Wang, X., Huang, W., Chen, J., and Chen, F.: Holocene moisture variations in western arid central Asia inferred from loess records from NE Iran, *G-cubed*, 21, e2019GC008616, <https://doi.org/10.1029/2019gc008616>, 2020.
- Wang, W., Feng, Z., Ran, M., and Zhang, C.: Holocene climate and vegetation changes inferred from pollen records of Lake Aibi, northern Xinjiang, China: A potential contribution to understanding of Holocene climate pattern in East-central Asia, *Quatern. Int.*, 311, 54–62, <https://doi.org/10.1016/j.quaint.2013.07.034>, 2013.
- Wang, Y., Cheng, H., Edwards, R. L., An, Z., Wu, J., Shen, C., and Dorale, J. A.: A high-resolution absolute-dated late Pleistocene monsoon record from Hulu cave, China, *Science*, 294, 20 2345–2348, <https://doi.org/10.1126/science.1064618>, 2001.
- Xu, H., Lan, J., Zhang, G., and Zhou, X.: Arid Central Asia saw mid-Holocene drought, *Geology*, 47, 255–258, <https://doi.org/10.1130/g45686.1>, 2019.

- Yang, Y., Feng, Z., Zhang, D., Lan, B., Ran, M., Wang, W., and Sun, A.: Holocene hydroclimate variations in the eastern Tianshan Mountains of northwestern China inferred from a palynological study, *Palaeogeogr. Palaeoclimatol.*, 564, 110184, <https://doi.org/10.1016/j.palaeo.2020.110184>, 2021.
- Zhang, D. and Feng, Z.: Holocene climate variations in the Altai Mountains and the surrounding areas: A synthesis of pollen records, *Earth-Sci. Rev.*, 185, 847–869, <https://doi.org/10.1016/j.earscirev.2018.08.007>, 2018.
- Zhang, H., Yu, K., Zhao, J., Feng, Y., Lin, Y., Zhou, W., and Liu, G.: East Asian Summer Monsoon variations in the past 12.5 ka: High-resolution  $\delta^{18}\text{O}$  record from a precisely dated aragonite stalagmite in central China, *J. Asian Earth Sci.*, 73, 162–175, <https://doi.org/10.1016/j.jseaes.2013.04.015>, 2013.
- Zhang, D., Chen, X., Li, Y., Ran, M., Yang, Y., Zhang, S., and Feng, Z.: Holocene moisture variations in the arid central Asia: new evidence from the southern Altai mountains of China, *Sci. Total Environ.*, 735, 139545, <https://doi.org/10.1016/j.scitotenv.2020.139545>, 2020.
- Zhao, Y., An, C., Mao, L., Zhao, J., Tang, L., Zhou, A., Li, H., Dong, W., Duan, F., and Chen, F.: Vegetation and climate history in arid western China during MIS2: New insights from pollen and grain-size data of the Balikun Lake, eastern Tien Shan, *Quaternary Sci. Rev.*, 126, 112–125, <https://doi.org/10.1016/j.quascirev.2015.08.027>, 2015.
